# Supplementary material
Source: publisher figshare collection journal article supplement (https://frontiersin.figshare.com/ndownloader/files/13075895)
Supplement: Supplementary file [file 13075895]

**Supplementary Table 2.** SpA produced during *in vivo* experimental *S. aureus* infection.

| Host | <i>S. aureus</i> strain | Organ  | Total abscess weight (mg) | ng (fmol) SpA / mg abscess | Total SpA µg (pmol) |
|------|-------------------------|--------|---------------------------|----------------------------|---------------------|
| µMT  | Newman                  | Kidney | 53.4                      | 415.2 (9.88)               | 22.2 (0.528)        |
| µMT  | Newman                  | Kidney | 57.0                      | 148.4 (3.57)               | 8.5 (0.202)         |
| µMT  | Newman                  | Liver  | 52.5                      | 347.9 (8.28)               | 18.3 (0.436)        |
| µMT  | Newman                  | Liver  | 41.4                      | 57.7 (1.37)                | 2.4 (0.057)         |
| B6   | Newman                  | Kidney | 48.0                      | 4.7 (0.11)                 | 0.2 (0.005)         |
| B6   | Newman                  | Kidney | 34.8                      | 39.1 (0.93)                | 1.4 (0.033)         |
| B6   | Newman                  | Liver  | 64.1                      | 19.0 (0.45)                | 1.2 (0.029)         |
| B6   | Newman                  | Liver  | 68.7                      | 25.9 (0.62)                | 1.8 (0.043)         |
| µMT  | Δ spa                   | Kidney | 38.3                      | ND                         | ND                  |
| µMT  | Δ spa                   | Kidney | 16.1                      | ND                         | ND                  |
